# Uncertainty is Maintained and Used in Working Memory

Aspen H. Yoo<sup>1,2,3</sup>, Luigi Acerbi<sup>1,2,4</sup>, Wei ji Ma<sup>1,2</sup>

Department of Psychology, New York University, NY, USA<sup>1</sup>

Center for Neural Science, New York University, NY, USA<sup>2</sup>

Department of Psychology, University of California, Berkeley, CA, USA<sup>3</sup>

Department of Computer Science, University of Helsinki, Helsinki, Finland<sup>4</sup>

**Funding:** This work was supported by NIH grant R01EY020958 to W.J.M. and training grant T32 EY7136-25 to A.H.Y.

# 1 Abstract

2 What are the contents of working memory? In both behavioral and neural computational models, the working mem-  
3 ory representation of a stimulus is typically described by a single number, namely a point estimate of that stimulus.  
4 Here, we asked if people also maintain the uncertainty associated with a memory, and if people use this uncertainty  
5 in subsequent decisions. We collected data in a two-condition orientation change detection task; while both condi-  
6 tions measured whether people used memory uncertainty, only one required maintaining it. For each condition, we  
7 compared an optimal Bayesian observer model, in which the observer uses an accurate representation of uncertainty  
8 in their decision, to one in which the observer does not. We find that this “Use Uncertainty” model fits better for all  
9 participants in both conditions. In the first condition, this result suggests that people use uncertainty optimally in a  
10 working memory task when that uncertainty information is available at the time of decision, confirming earlier results.  
11 Critically, the results of the second condition suggest that this uncertainty information was maintained in working  
12 memory. We test model variants and find that our conclusions do not depend on our assumptions about the observer’s  
13 encoding process, inference process, or decision rule. Our results provide evidence that people have uncertainty that  
14 reflects their memory precision at an item-specific level, maintain this information over a working memory delay, and  
15 use it implicitly in a way consistent with an optimal observer. These results challenge existing computational models  
16 of working memory to update their frameworks to represent uncertainty.

17  
18 **Keywords:** visual working memory, Bayesian observer, optimal, uncertainty

## 19 2 Introduction

20 Visual working memory, the process involved in actively maintaining visual information over a short period, is essen-  
21 tial for numerous everyday behaviors as “simple” as integrating visual information across saccades and as “complex”  
22 as reading comprehension, problem solving, and decision making (Baddeley & Hitch, 1974; Baddeley, 2003; Fukuda,  
23 Vogel, Mayr, & Awh, 2010; Conway, Kane, & Engle, 2003; Just & Carpenter, 1992). As important as it is, visual  
24 working memory is also a notoriously limited process, resulting in an imperfect and incomplete picture of the world it  
25 aims to represent.

26 Both behavioral (e.g., Zhang & Luck, 2008; Bays & Husain, 2008; van den Berg, Shin, Chou, George, & Ma,  
27 2012; Fougnie, Suchow, & Alvarez, 2012) and neural (e.g., Ermentrout, 1998; Wang, 2001; Compte, 2006) models of  
28 visual working memory typically represent people’s memory as a single number, a noisy estimate of the value of the  
29 stimulus. For example, someone may remember a 34° oriented line as 37°. It is, however, important in many visual  
30 working memory decisions to represent more than just a point estimate of the remembered stimulus, but the uncertainty  
31 as well. Uncertainty is technically defined as the width of a belief distribution over a stimulus, but intuitively represents  
32 how unsure an observer is about the stimulus. This is different from memory precision, which is how precisely an  
33 observer actually remembers the stimulus. An ideal observer’s uncertainty will reflect the precision with which they  
34 remembered an item, such that they are less uncertain for more precise memories. In a variety of domains, taking  
35 uncertainty into account would increase performance and thus should be used. For example, high uncertainty over the  
36 memory of the location of a coffee cup may result in someone looking at it before reaching for it. High uncertainty  
37 over whether a friend changed their appearance may result in someone being less likely to comment on it.

38 Does uncertainty get taken into account in working memory-based decisions? An intuitive first place to look  
39 is the literature on working memory confidence, since confidence can be thought of as a readout of uncertainty.  
40 Experimenters have probed memory confidence by asking people to provide a rating (Rademaker, Tredway, & Tong,  
41 2012; Vandembroucke et al., 2014; Samaha & Postle, 2017), choose the best remembered item (Fougnie et al., 2012;  
42 Suchow, Fougnie, & Alvarez, 2017), or make a memory-based bet (Yoo, Klyszejko, Curtis, & Ma, 2018; Honig,  
43 Ma, & Fougnie, 2020). These studies have demonstrated that people have higher working memory confidence on  
44 trials that are remembered more accurately (but see Sahar, Sidi, & Makovski, 2020; Bona, Cattaneo, Vecchi, Soto,  
45 & Silvanto, 2013; Bona & Silvanto, 2014; Vlassova, Donkin, & Pearson, 2014; Maniscalco & Lau, 2015; Adam &  
46 Vogel, 2017; Samaha, Barrett, Sheldon, LaRocque, & Postle, 2016 for conflicting results), and a computational model  
47 in which memory judgements and confidence ratings are derived from the same underlying memory precision can  
48 quantitatively account for these joint data (van den Berg, Yoo, & Ma, 2017).

49 All these studies ask the participant to consciously access the quality of their memory. However, in naturalistic  
50 settings, people are typically not directly interrogated about their uncertainty, but use it implicitly in other decisions.  
51 For example, looking before reaching for one’s coffee cup or commenting on a friend’s appearance are decisions that  
52 presumably use uncertainty without conscious report. In this study, we take inspiration from perceptual decision-  
53 making studies, which have demonstrated that people implicitly incorporate uncertainty in a variety of decisions (e.g.,  
54 van Beers, Sittig, & Gon, 1999; Ernst & Banks, 2002; Alais & Burr, 2004; Körding & Wolpert, 2004; Knill & Pouget,

55 2004; Ma, Navalpakkam, Beck, van den Berg, & Pouget, 2011; Jazayeri & Shadlen, 2010; Stocker & Simoncelli,  
56 2006).

57 There is already some evidence that people use uncertainty implicitly in working memory-based decisions. Kesh-  
58 vari and colleagues had humans complete a four-item orientation change detection task (Keshvari, van den Berg, &  
59 Ma, 2012); Devkar and colleagues had humans and monkeys complete a three-item orientation change localization  
60 task (Devkar, Wright, & Ma, 2017). Stimuli in both studies were ellipses, which were independently assigned to  
61 be longer and narrower, providing “high-reliability” orientation information, or shorter and wider, providing “low-  
62 reliability” orientation information. The reliability of ellipses affected the precision with which they were encoded,  
63 and thus should have affected the memory uncertainty associated with each item. To maximize performance in both  
64 tasks, participants’ uncertainty would need to reflect this variability in item-specific precision. Both studies found that  
65 a computational model that assumes participants use item-specific uncertainty accounted better for people’s choices  
66 than alternative models.

67 Crucially, while these two studies provide evidence that people can implicitly use uncertainty, some experimental  
68 design choices do not allow us to conclude that people are actually maintaining uncertainty per se. First, participants  
69 in the study by Devkar and colleagues received trial-to-trial feedback on the correctness of their response. It is thus  
70 possible that participants simply learned a stimulus-response mapping (Maloney & Mamassian, 2009) rather than per-  
71 forming Bayesian inference or other forms of probabilistic computation (i.e., still using uncertainty in their decision;  
72 Ma, 2010). Second, precision in both studies was experimentally manipulated through ellipse reliability, which was  
73 held constant through a working memory delay. Thus, participants could have used this ellipse reliability as a proxy for  
74 uncertainty, rather than maintaining this exact information over the working memory delay (Barthelme & Mamassian,  
75 2010).

76 Thus, the goal of this study was to investigate whether and how uncertainty is maintained over a working memory  
77 delay and used implicitly in a working memory task. To reach this goal, we collected data in a two-condition orienta-  
78 tion change detection task and developed computational models to test different hypotheses about uncertainty. In the  
79 first condition, we established that people use uncertainty if a proxy to it is provided to them, replicating the results  
80 from Keshvari and others (2012). In the second condition, we asked if people still use uncertainty if this proxy is not  
81 provided at the time of decision. In other words, we asked if uncertainty is being maintained in working memory.

## 82 **3 Experimental Methods**

### 83 **3.1 Participants**

84 Thirteen participants (11 female; mean age  $M = 21.1$  years,  $SD = 2.5$ ) completed both conditions. All participants had  
85 normal or corrected-to-normal vision. Participants were naive to the study’s hypotheses and were paid \$12/hour and  
86 a \$24 completion bonus. We obtained informed, written consent from all participants. The study was in accordance  
87 with the Declaration of Helsinki and was approved by the Institutional Review Board of New York University (IRB-  
88 FY2019-2490). Seven other participants were excluded because they did not meet performance criteria (explained in

89 the Cross-session procedure section).

## 90 **3.2 Stimuli**

91 Stimuli were four, light-grey, oriented ellipses on a medium-grey background. Each ellipse could be long or short,  
92 to provide respectively higher or lower reliability information regarding the orientation of the ellipses. All ellipses  
93 had an area of 1.19 degrees of visual angle (dva). The high-reliability ellipse had an ellipse eccentricity of 0.9, such  
94 that the major axis and minor axes were 1.02 and 0.37 dva, respectively. The low-reliability ellipse eccentricity was  
95 determined separately for each participant to equate performance (details in Procedure).

96 On every trial, a stimulus display consisted of four ellipses. The probability of each ellipse being high reliability  
97 was 0.5, independent of the reliability of the other ellipses. The location of the first ellipse was drawn from a uniform  
98 distribution between polar angles  $0^\circ$  and  $90^\circ$ . Each ellipse after that was placed such that all ellipses were  $90^\circ$  apart  
99 on an imaginary annulus that was 7 dva away from fixation. Afterward, the x- and y- location of the ellipses were  
100 independently jittered -0.3 to 0.3 dva. In one condition, there were additionally oriented line stimuli, which were set  
101 to have approximately the same area as the ellipses. Stimuli were displayed on a 23 inch LED monitor with a refresh  
102 rate of 60 Hz and a resolution of 1920 x 1080 pixels.

## 103 **3.3 Procedure**

### 104 **3.3.1 Trial Procedure**

105 **Ellipse condition.** A trial began with a fixation cross presented for 1000 ms. Four ellipses were presented for 100 ms,  
106 followed by a 1000 ms delay, then by another four ellipses for 100 ms. On half of the trials, all ellipses in the second  
107 stimulus presentation were identical to the ellipses in the first stimulus presentation. On the other half of the trials, one  
108 ellipse changed in orientation. This change was drawn from a uniform distribution, so change of any magnitude had  
109 equal probability. Each ellipse had an equal probability of containing the change. “Change” and “no change” trials  
110 were randomly interleaved throughout the experiment. The participant indicated with a keyboard button press whether  
111 they believed there was an orientation change between the two displays.

112 **Line condition.** In the Line condition, the stimuli in the second presentation were oriented lines rather than  
113 ellipses. The task was otherwise identical. An example of a trial in the Ellipse and Line conditions is illustrated in  
114 Figure 1.

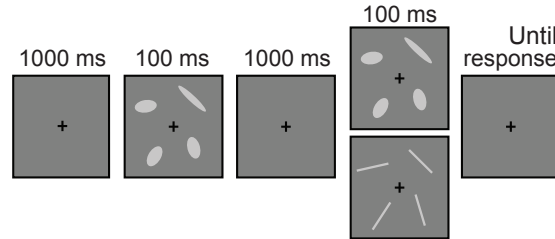

Figure 1: **Trial sequence.** Participants fixated on a cross, saw four ellipses (here showing one high-reliability ellipse and three low-reliability ellipses), maintained them over a delay, saw four stimuli again, and reported whether they believed there was an orientation change or not. In the Ellipse condition, ellipses in the second presentation were of the same reliability as in the first. In the Line condition, lines replaced ellipses in the second stimulus presentation, to avoid providing cues to the precision with which the first items were maintained.

### 115 3.3.2 Cross-Session Procedure

116 Participants completed both conditions over six one-hour sessions. They began their first session with a Practice  
117 block, designed to ease the participants into the task. They then completed 2000 trials of each condition, preceded  
118 by a Threshold block to set the “short” ellipse reliability for each condition. Participants completed all of one con-  
119 dition before completing the other, and the order was counterbalanced across participants. Participants were verbally  
120 informed that each trial had a 0.5 probability of a change occurring, that a change (if present) would occur in exactly  
121 one ellipse, and the change could be “of any magnitude; big changes are as possible as small changes.” Participants  
122 were also verbally informed that some ellipses would be more elongated than others, that this may affect performance,  
123 and that half of the experiment would involve the stimuli changing from ellipses to lines. They were informed that  
124 their task did not change; the goal was always to indicate whether there was a change in orientation.

125 The Practice block consisted of 256 trials and was designed to ease naive participants into the speed of the task.  
126 The stimulus presentation time decreased throughout the course of the Practice block, from 333 ms to 100 ms, in 33  
127 ms increments every 32 trials. Unlike the actual task, the ellipse eccentricities (i.e., reliabilities) of all ellipses within  
128 each trial were the same, but changed across trials. The stimuli in the second stimulus presentation corresponded to  
129 the condition that the participant completed first. For example, the stimuli in the second presentation were lines if the  
130 participant completed the Line condition first.

131 The Threshold block consisted of 400 trials and was used to set the ellipse eccentricity of the low-reliability ellipse  
132 in each condition. Like the Practice block, the ellipse eccentricities of all ellipses on each trial were the same, but  
133 changed on a trial-to-trial basis. The second stimulus presentation set were either ellipses or lines, corresponding to  
134 which condition the threshold was being set for. A cumulative normal psychometric function was fit to the accuracy as  
135 a function of ellipse eccentricity, and the low-reliability ellipse eccentricity was set as the value that corresponded to a  
136 predicted 65% accuracy. If the ceiling performance of the participant was estimated to be less than 75%, the Threshold  
137 block was repeated. If the psychometric function could not estimate an ellipse reliability for which performance would

138 hit 65% after the second try, the participant was excluded from the experiment. Seven participants were excluded based  
139 on these criteria.

## 140 4 Experimental Results

141 The goal of our study was to investigate whether people maintained and used uncertainty implicitly in a working  
142 memory-based decision. To do this, we conducted a two-condition orientation change detection task. People could use  
143 memory uncertainty to maximize performance in both conditions, but only the Line condition required maintenance of  
144 that uncertainty. We conducted five repeated-measures ANOVAs to test whether condition (Ellipse, Line), the number  
145 of high-reliability ellipses displayed ( $N_{\text{high}}$ : 0, 1, 2, 3, 4), or their interaction significantly affected the following values:  
146 proportion report change, false alarm rate, hit rate (for all items), hit rate (when the changed item was a low-reliability  
147 ellipse), and hit rate (when the changed item was a high-reliability ellipse). These values are visualized in Figure 2,  
148 and the statistics are reported in Table 1.

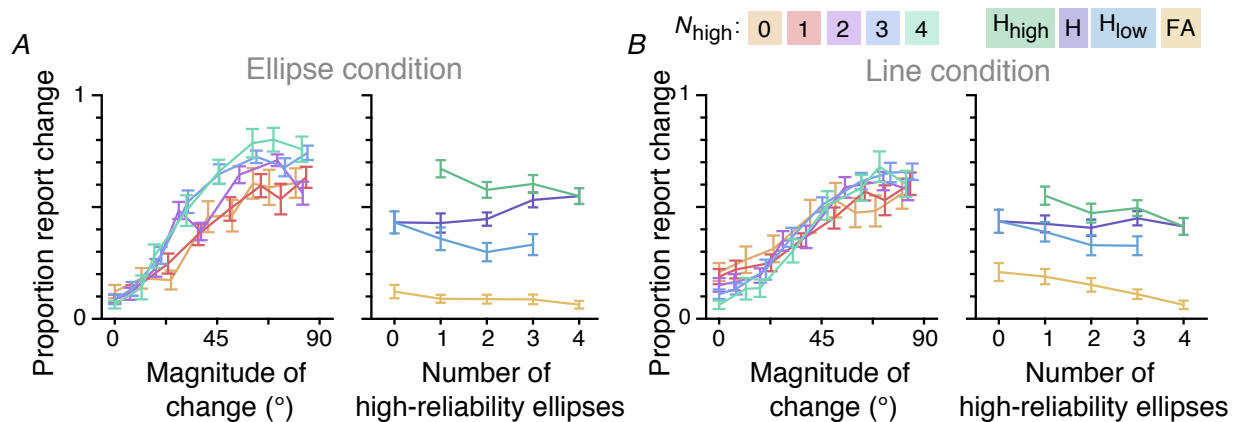

Figure 2: **Behavioral data.** Illustration of behavioral data for (A) Ellipse condition and (B) Line condition. For each condition, the left plots illustrates proportion report change as a function of magnitude of change. Data are binned by quantile, and different colored lines illustrate data from trials with different numbers of high-reliability ellipses presented on the first display. The right plots illustrate the proportion report change as a function of number of high-reliability ellipses, conditioned on whether there was no actual change (false alarm (FA): gold), a change in a low-reliability ellipse ( $H_{\text{low}}$ : blue), a change in a high-reliability ellipse ( $H_{\text{high}}$ : green), or a change in any ellipse (hit (H): purple). The color legend is displayed above the plots. Note that the aggregated hits are a weighted combination of the reliability-conditioned hits. The “Z” shape formed by the hit lines are an instance of Simpson’s paradox.

| Dependent Variable          | Factor                                    | Statistics                                 | $p$                                      | $\varepsilon$ | $\eta^2$    |
|-----------------------------|-------------------------------------------|--------------------------------------------|------------------------------------------|---------------|-------------|
| Proportion Report Change    | $N_{\text{high}}$                         | $F(1.38, 16.50) = 3.37$                    | 0.07                                     | 0.34          | 0.03        |
|                             | Condition                                 | $F(1, 12) = 1.33$                          | 0.27                                     | –             | 0.01        |
|                             | $N_{\text{high}} \times \text{Condition}$ | <b><math>F(2.12, 25.38) = 6.32</math></b>  | <b>0.005</b>                             | <b>0.52</b>   | <b>0.04</b> |
| False Alarm Rate            | $N_{\text{high}}$                         | <b><math>F(1.93, 23.17) = 18.21</math></b> | <b><math>2.07 \times 10^{-5}</math></b>  | <b>0.48</b>   | <b>0.14</b> |
|                             | Condition                                 | <b><math>F(1, 12) = 6.50</math></b>        | <b>0.03</b>                              | –             | <b>0.08</b> |
|                             | $N_{\text{high}} \times \text{Condition}$ | <b><math>F(1.95, 23.36) = 4.94</math></b>  | <b>0.02</b>                              | <b>0.49</b>   | <b>0.05</b> |
| Hit Rate (all)              | $N_{\text{high}}$                         | <b><math>F(1.36, 16.30) = 5.29</math></b>  | <b>0.03</b>                              | <b>0.34</b>   | <b>0.04</b> |
|                             | Condition                                 | $F(1, 12) = 2.47$                          | 0.14                                     | –             | 0.03        |
|                             | $N_{\text{high}} \times \text{Condition}$ | <b><math>F(2.04, 24.48) = 5.33</math></b>  | <b>0.01</b>                              | <b>0.51</b>   | <b>0.03</b> |
| Hit Rate (low-reliability)  | $N_{\text{high}}$                         | <b><math>F(1.76, 21.07) = 23.26</math></b> | <b><math>8.43 \times 10^{-6}</math></b>  | <b>0.59</b>   | <b>0.08</b> |
|                             | Condition                                 | $F(1, 12) = 0.29$                          | 0.60                                     | –             | 0.005       |
|                             | $N_{\text{high}} \times \text{Condition}$ | $F(2.01, 24.15) = 0.37$                    | 0.69                                     | 0.67          | 0.002       |
| Hit Rate (high-reliability) | $N_{\text{high}}$                         | <b><math>F(1.98, 23.79) = 35.44</math></b> | <b><math>7.72 \times 10^{-08}</math></b> | <b>0.66</b>   | <b>0.13</b> |
|                             | Condition                                 | <b><math>F(1, 12) = 14.66</math></b>       | <b>0.002</b>                             | –             | <b>0.17</b> |
|                             | $N_{\text{high}} \times \text{Condition}$ | $F(2.15, 25.80) = 0.75$                    | 0.49                                     | 0.72          | 0.003       |

Table 1: **Results of two-way repeated-measures ANOVA.** Independent variables are  $N_{\text{high}}$  (0,1,2,3,4) and condition (Ellipse, Line), and dependent variables are displayed as the first column. Statistics of significant effects are bolded. For all ANOVAs, we report the Greenhouse-Geisser corrected results and  $\varepsilon$  (sphericity correction) when appropriate.

149 There was a statistically significant interaction between  $N_{\text{high}}$  and condition on proportion report change. In only  
150 the Ellipse condition, the proportion report change was modulated by the number of high-reliability ellipses (left plot  
151 of Fig. 2 A, B). There were significantly more false alarms in the Line condition ( $M = 0.14$ ,  $SEM = 0.03$ ) than in  
152 the Ellipse condition ( $M = 0.09$ ,  $SEM = 0.02$ ; purple lines in right plots of Fig. 2 A, B). Perhaps people mistook the  
153 change in stimulus as a change in orientation. Both reliability-conditioned hit rates (blue and green lines in right plots  
154 of Fig. 2 A, B) decreased with increasing  $N_{\text{high}}$ . Additionally, participants had significantly lower high-reliability hits  
155 in the Line condition and the Ellipse condition.

156 There is an interesting reverse in the qualitative trend when looking at all hit rates across all trials: hit rate increases  
157 as a function of  $N_{\text{high}}$ . This Simpson's paradox is a result of weighted averaging and the performance difference  
158 between the reliability-conditioned hit rates. As the number of high-reliability ellipses in a display increases, so does  
159 the probability of a change occurring in a high-reliability ellipse. Thus, the total hit rates for higher  $N_{\text{high}}$ s contain more  
160 high-reliability hits than low-reliability hits, driving this value upward. Similarly, the trials to compute hit rates for  
161 lower  $N_{\text{high}}$ s predominantly contain changes in low-reliability ellipses, thus driving the average downward. There was  
162 also a significant interaction between condition and  $N_{\text{high}}$  because this increase was greater in the Ellipse condition.  
163 This unsurprisingly reflects the results of proportion report change, for they are related values.



164 These statistics show that differences between factors and conditions exist, but are dissatisfying because they do not  
165 offer explanations of what these differences mean. In this paper, we take an approach to understand underlying working  
166 memory processes through computational modeling. Computational modeling plays a crucial role in the interpretation  
167 of data and the understanding of the underlying working memory and decision-making processes (Levenstein et al.,  
168 2020; Edwards, 1954). It allows us to make explicit assumptions and precise quantitative predictions, which provide  
169 committal, falsifiable explanations of the processes involved.

## 170 **5 Modeling Methods**

171 To test whether people are maintaining and using uncertainty when making their change detection decision, we use  
172 Bayesian observer models. Bayesian models provide a normative, flexible, and interpretable framework to study the  
173 working memory process. These models are particularly useful in cases where the observer is trying to make a decision  
174 without full knowledge of task-relevant information. In working memory, people do not have full knowledge because  
175 information is not remembered perfectly. While Bayesian decision theory describes how an observer should behave  
176 in order to maximize performance, different components of the model can be easily substituted with incorrect beliefs  
177 or suboptimal use of information, and thus provides a good template for building models with “imperfectly optimal  
178 observers” (Maloney & Zhang, 2010) or “model mismatch” (Orhan & Jacobs, 2014; Beck, Ma, Pitkow, Latham, &  
179 Pouget, 2012; Acerbi, Ma, & Vijayakumar, 2014).

180 We model the observer’s decision process as consisting of an encoding stage and decision stage. The encoding  
181 stage describes the task statistics and our assumptions about how memories are generated. In the decision stage,  
182 the observer calculates a decision variable based on their belief of the encoding stage and decides whether to report  
183 Change or No change based on some decision rule. We compared two models: one in which uncertainty is maintained  
184 and used and another that is not, named the “Use Uncertainty” and the “Ignore Uncertainty” model, respectively. This  
185 section describes how these models were defined, fit, and compared.

### 186 **5.1 Encoding Stage**

187 In this section, we define the statistical structure of the experiment and define our assumptions about how memories  
188 are generated in an observer. On every trial, there is a 0.5 probability of there being a change,  $p(C = 1) = 0.5$ , where  $C$   
189 takes values 0 (no change) and 1 (change). On change trials, exactly one item changes in its orientation, and each item  
190 is equally probable to be changed. The orientation change,  $\Delta$ , is drawn from a uniform distribution,  $p(\Delta) = \frac{1}{2\pi}$ . (For  
191 mathematical convenience, and without loss of generality, we doubled the actual orientation of stimuli in all model  
192 specifications such that the values span 0 to  $2\pi$  rather than 0 to  $\pi$ . We do not double these values when illustrating  
193 model fits.)

194 We denote the vector of all orientations of the items presented on the first display by  $\xi$ , in which each element is an  
195 independent draw from a uniform distribution over orientation space. The vector of orientations at the second display,  
196  $\phi$ , was identical to  $\xi$  in no change trials. In change trials, the  $i$ th element of  $\phi$ , the location of change, was equivalent

197 to  $\xi_i + \Delta$ .

198 We model the memory process for each item of each display according to the Variable Precision model (van den  
199 Berg et al., 2012; Fougne et al., 2012), by which memories are described as a continuous resource that randomly  
200 fluctuates across items and trials. The noisy measurements of each item on each display,  $\mathbf{x} = (x_1, \dots, x_N)$  and  $\mathbf{y} =$   
201  $(y_1, \dots, y_N)$ , are conditionally independent and drawn from a Von Mises distribution centered on the actual orientation  
202 presentation,

$$p(\mathbf{x}|\boldsymbol{\xi}; \boldsymbol{\kappa}_x) = \prod_{i=1}^N p(x_i|\xi_i, \kappa_{x,i}) = \prod_{i=1}^N \frac{1}{2\pi I_0(\kappa_{x,i})} e^{\kappa_{x,i} \cos(x_i - \xi_i)}$$

$$p(\mathbf{y}|\boldsymbol{\phi}; \boldsymbol{\kappa}_y) = \prod_{i=1}^N p(y_i|\phi_i, \kappa_{y,i}) = \prod_{i=1}^N \frac{1}{2\pi I_0(\kappa_{y,i})} e^{\kappa_{y,i} \cos(y_i - \phi_i)}.$$

203 The  $\kappa$ s are the concentration parameter of the Von Mises distribution, and are related to the precision with which each  
204 item is remembered; a higher  $\kappa$  corresponds to higher precision. The subscript of each  $\kappa$  indicates which item it refers  
205 to (e.g.,  $\kappa_{x,i}$  is concentration parameter for  $x_i$ , the  $i^{\text{th}}$  item the first stimulus presentation). We assume that memory  
206 precision varies across items, above and beyond the precision differences due to stimulus reliability. In other words,  
207  $\kappa_{x,i}$  and  $\kappa_{y,i}$  are themselves random variables, rather than single values. Rather than sampling  $\kappa$  itself, we sample the  
208 Fisher information of the Von Mises distribution,  $J$ , from a gamma distribution:

$$p(J) = \frac{1}{\Gamma\left(\frac{\bar{J}}{\tau}\right)} \bar{J}^{\frac{\bar{J}}{\tau}-1} e^{-J/\tau},$$

209 where  $\tau$  is the scale parameter of the gamma distribution and  $\bar{J}$  is the mean precision. The relationship between  $J$  and  
210  $\kappa$  is the following:

$$J = \kappa \frac{I_1(\kappa)}{I_0(\kappa)},$$

211 where  $I_0$  is a modified Bessel function of the first kind of order 0 and  $I_1$  is a modified Bessel function of the first kind  
212 of order 1 (van den Berg et al., 2012; Keshvari et al., 2012). We allow the mean precision to differ across stimulus  
213 shape; the precisions of memories corresponding to low-reliability ellipses are drawn from a gamma distribution with  
214 mean  $\bar{J}_{\text{low}}$  and high-reliability ellipses with mean  $\bar{J}_{\text{high}}$ . Parameter  $\tau$  is shared across both distributions. Because items  
215 in the first display were presented earlier, there are certainly differences in the precision with which items in the first  
216 and second display are maintained, independent of ellipse reliability. However, the amount that the first and second  
217 displays contribute to the overall measured change are extremely hard to tease apart in the model. Thus, we use one  
218 parameter per reliability and recognize that this estimate will be some average of the precisions of the first and second  
219 display.

220 When modeling the Line condition, we have an additional parameter,  $\bar{J}_{\text{line}}$ , which corresponds to the mean precision  
221 with which each line on the second display is remembered by the observer. To limit model complexity, the gamma  
222 function from which each line's precision is drawn shares the same scale parameter  $\tau$  as the distributions from which  
223 the ellipse precisions are drawn.

## 224 5.2 Decoding Stage

### 225 5.2.1 Decision Variable

226 The essence of Bayesian inference is that an observer can compute a posterior over task-relevant latent variables, and  
 227 should if they want to maximize performance. In this case, the observer should calculate the probability of the state  
 228 of the world (i.e., change or no change) given their observations,  $p(C|\mathbf{x}, \mathbf{y})$ , which they can compute using Bayes rule.  
 229 With a scenario in which there are only two states of the world, it is convenient to combine these into a ratio. Thus,  
 230 we assume the observer calculates, for each item, the ratio of the likelihood of there being change and the likelihood  
 231 of there being no change:

$$d = \frac{p(C = 1|\mathbf{x}, \mathbf{y})}{p(C = 0|\mathbf{x}, \mathbf{y})} = \frac{p(\mathbf{x}, \mathbf{y}|C = 1)p(C = 1)}{p(\mathbf{x}, \mathbf{y}|C = 0)p(C = 0)}. \quad (1)$$

232 Details of the derivation can be found in Appendix 8.1, but this simplifies to the following expression:

$$d = \frac{p(C = 1)}{p(C = 0)} \frac{1}{N} \sum_{i=1}^N d_i, \quad (2)$$

233 where

$$d_i = \frac{I_0(\kappa_{x,i})I_0(\kappa_{y,i})}{I_0\left(\sqrt{\kappa_{x,i}^2 + \kappa_{y,i}^2 + 2\kappa_{x,i}\kappa_{y,i}\cos(x_i - y_i)}\right)}. \quad (3)$$

234  $I_0$  is a modified Bessel function of the first kind of order 0, and the  $\kappa$ s are the concentration parameters of the noise  
 235 distributions for the item indicated in the subscript. Intuitively,  $d_i$  provides a measure of the evidence of change for the  
 236  $i^{\text{th}}$  item. It increases with the measured amount of change,  $x_i - y_i$ , weighted by a function of the precisions with which  
 237  $x_i$  and  $y_i$  are remembered. The  $d_i$ s are averaged in the decision variable  $d$ , providing the optimal measure of evidence  
 238 of change of the entire display.

239 This is the step in which the use of uncertainty comes in. Observers who correctly maintain and use uncertainty  
 240 (i.e., observers who act in accordance with the optimal, “Use Uncertainty” model) compute exactly  $d_i$  as described.  
 241 However, observers acting in accordance with the “Ignore Uncertainty” model do not know or do not consider that  
 242 the precision of their memories for all items in both displays varies. Computing the decision rule for the Ignore  
 243 Uncertainty observer is the same as replacing all  $\kappa$ s in Eq. 3 with a constant, resulting in the following local decision  
 244 variable:

$$d_i = \frac{I_0^2(\kappa_{\text{ass}})}{I_0\left(\kappa_{\text{ass}}\sqrt{2 + 2\cos(x_i - y_i)}\right)}, \quad (4)$$

245 where  $\kappa_{\text{ass}}$  is the assumed precision for all items on all displays. The decision variable thus becomes just a function of  
 246  $\cos(x_i - y_i)$ , because the remainder of the expression is constant.

### 247 5.2.2 Decision Rule

248 The observer maps this decision variable onto a response by reporting Change whenever the probability of there being  
 249 a change is greater than 0.5. An optimal observer would thus respond Change when the ratio of the likelihood of there

250 being a change and the likelihood of there being no change (Eq. 2) is greater than 1 (Figure 3). However, we allow  
251 the observer to have some response bias (e.g., due to unequal priors, rewards, or motor costs), and thus implement the  
252 following decision rule:

$$\frac{1}{N} \sum_{i=1}^N d_i > k, \quad (5)$$

253 where  $k$  is a free parameter. For both models, we implemented global decision noise by adding zero-mean Gaussian  
254 noise with standard deviation  $\sigma_d$  to the log of decision variable  $d$  (Keshvari et al., 2012; Acerbi et al., 2014; Mueller  
255 & Weidemann, 2008). Additionally, participants randomly guess with probability  $\lambda$ , due to factors such as lapses in  
256 attention.

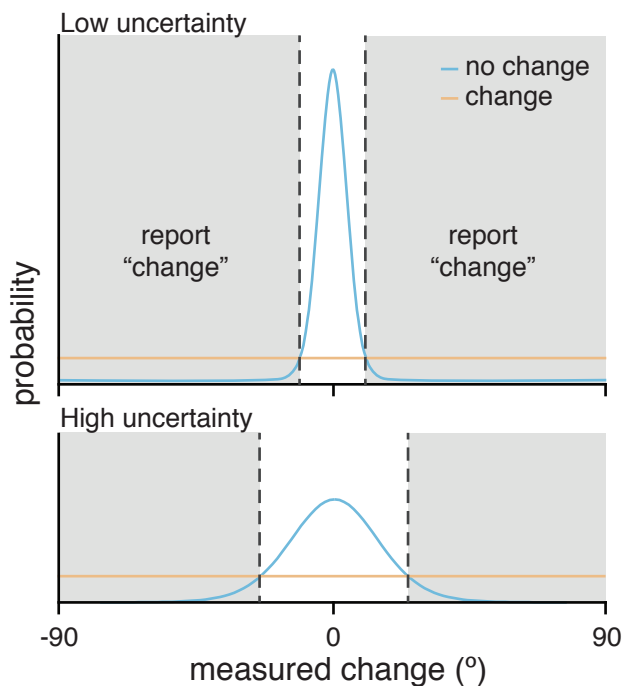

Figure 3: **Model didactics.** This didactic illustrates a simplified one-item version of this task. The probability of the measured change for an item given that the item did (orange) or did not (blue) change orientation, as estimated by the optimal observer. Uncertainty modulates the width of the no change distribution, such that higher uncertainty makes the no change distribution wider (bottom). The optimal observer (with  $k = 0$ ) places their decision boundaries at the intersection of the change and no change distributions (vertical dashed lines), reporting “change” whenever that state of the world is more probable (shaded region) and “no change” otherwise.

## 257 **5.3 Parameter Estimation and Model Comparison**

### 258 **5.3.1 Parameters**

259 Both models in both conditions have parameters  $\bar{J}_{\text{high}}, \bar{J}_{\text{low}}, \tau, k, \lambda$ , and  $\sigma_d$ . Parameters  $\bar{J}_{\text{high}}$  and  $\bar{J}_{\text{low}}$  correspond to the  
260 mean precision of the high- and low-reliability ellipses, respectively. Precision is also affected by the scale parameter  
261 of the gamma distribution from which item-wise precision is drawn,  $\tau$ ; this value is shared across the two ellipse types  
262 and the line when applicable. Parameter  $k$  is the observer's response bias;  $\lambda$  is the probability on each trial that the  
263 observer lapses and responds randomly;  $\sigma_d$  is the standard deviation of the Gaussian from which decision noise is  
264 simulated.

265 When fitting data from the Line condition, there is an additional parameter  $\bar{J}_{\text{line}}$ , corresponding to the mean preci-  
266 sion with which the line stimulus is represented. The Ignore Uncertainty model has one additional parameter:  $J_{\text{ass}}$ , the  
267 assumed precision of all stimuli in both displays.

### 268 **5.3.2 Parameter Estimation**

269 The likelihood of the parameter combination  $\theta$  for a given participant and model is the probability of the data given  
270 the parameter combination. We used the log likelihood, which we denote LL:

$$\begin{aligned} \text{LL}(\theta) &= \log p(\theta | \text{data, model}) \\ &= \log \prod_t^{N_{\text{trials}}} p(r_t | \theta) \\ &= \sum_t^{N_{\text{trials}}} \log p(r_t | \theta), \end{aligned}$$

271 where  $r_t$  is the participant's response on the  $t^{\text{th}}$  trial. For each participant, we used maximum-likelihood estimation  
272 to find which parameter combination best describes participant's data. Computing the LL analytically is intractable,  
273 so we used Inverse Binomial Sampling (van Opheusden, Acerbi, & Ma, 2020), a method which efficiently computes  
274 an unbiased estimate of the LL. This calculation is stochastic, so we additionally used an optimization algorithm that  
275 can account for stochasticity and expensive LL evaluations (BADS; Acerbi & Ma, 2017). BADS explicitly incorpo-  
276 rates uncertainty in the estimated LL and converges in fewer function evaluations than other stochastic optimization  
277 methods (e.g., CMA-ES, genetic algorithms), making it an ideal optimization method when likelihood calculations are  
278 computationally expensive and stochastic. We used 20 different starting positions, using Latin hypercube sampling, to  
279 reduce the probability of finding a local minimum. We took the parameter combination corresponding to the minimum  
280 negative log-likelihood of our runs as the ML parameter estimate. The estimated LL at the candidate optimum was  
281 reevaluated using 1000 samples in IBS, in order to reduce the standard deviation of estimation noise to less than 1. We  
282 denote the maximum log-likelihood by  $\text{LL}^*$ .

### 283 5.3.3 Model Comparison

We compared models using corrected Akaike Information Criterion (AICc; Hurvich & Tsai, 1987) and the Bayesian Information Criterion (BIC; Schwarz, 1978). BIC penalizes for additional parameters harsher than AICc.

$$\text{AICc} = -2\text{LL}^* + 2N_{\text{pars}} + \frac{2N_{\text{pars}}(N_{\text{pars}} + 1)}{N_{\text{trials}} - N_{\text{pars}} - 1}$$

$$\text{BIC} = -2\text{LL}^* + 2N_{\text{pars}} \log N_{\text{trials}}$$

### 284 5.4 Modeling Results

285 We compared the fits of the Use Uncertainty and Ignore Uncertainty models to each of the conditions separately. The  
286 Use Uncertainty model provides a good qualitative fit to the data in both conditions (top row of Figure 4A), while the  
287 Ignore Uncertainty model is unable to capture the data (bottom row of Figure 4A). This result is reflected quantitatively  
288 (Figure 4B). For both conditions, all of the 13 participants were better fit by the Use Uncertainty model than the Ignore  
289 Uncertainty model (median [95% bootstrapped confidence interval (CI)]  $\Delta\text{AICc}$  across subjects – Ellipse: 208 [109,  
290 368], Line: 108 [58, 370].  $\Delta\text{BIC}$  – Ellipse: 221 [122, 381], Line: 122, [71, 383]). The summed  $\Delta\text{AICc}$  and  $\Delta\text{BIC}$  are  
291 consistent and are available in Appendix 8.4. Parameter estimates for the Use Uncertainty model in the Ellipse and  
292 Line condition can be found in the Appendix (Tables 4 and 5, respectively).

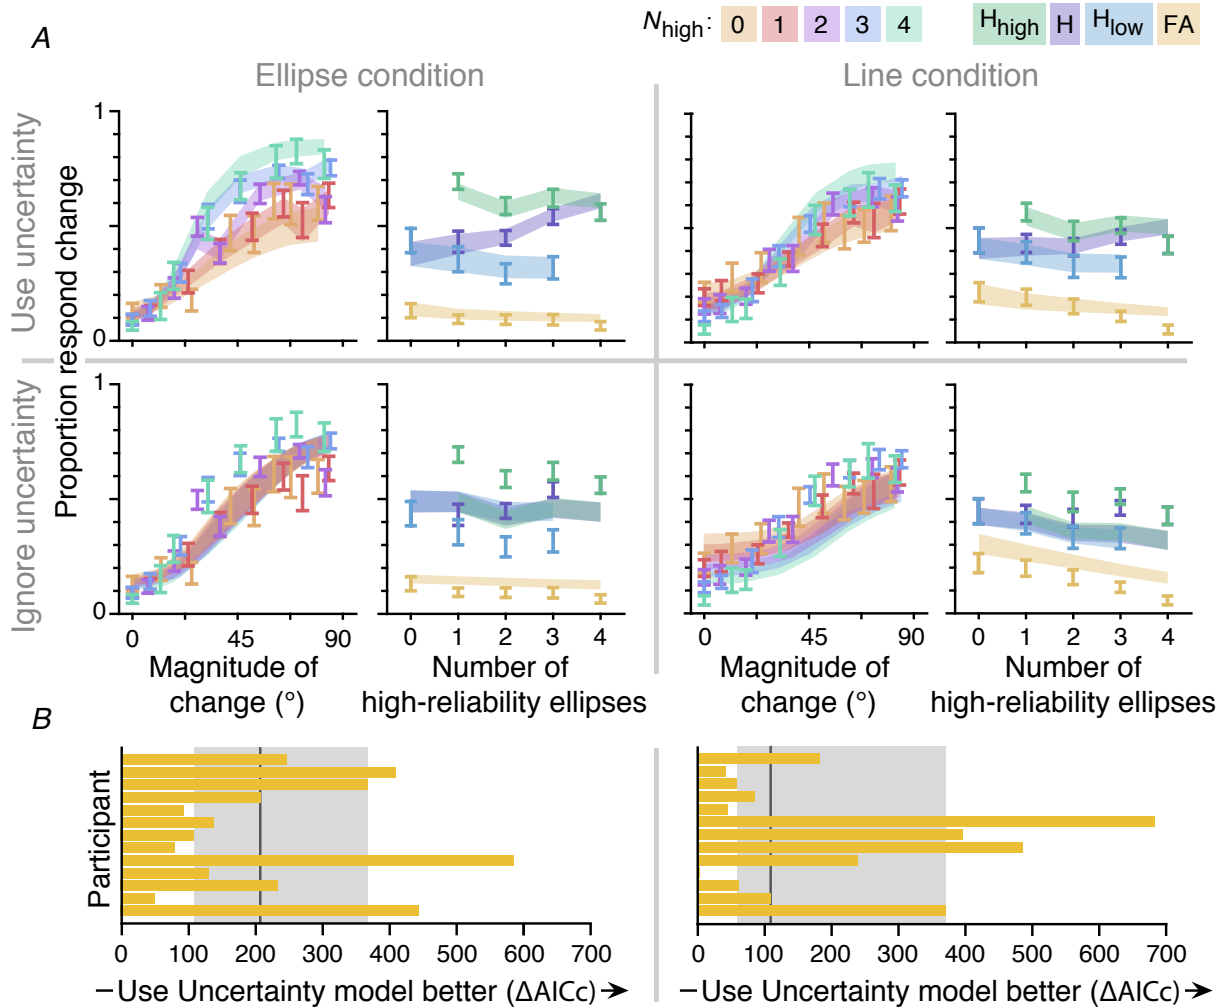

Figure 4: **Model fits.** *A.*  $M \pm SEM$  data (error bars) and model fits (fills) for the Use (top) and Ignore (bottom) Uncertainty models and the Ellipse (left) and Line (right) conditions. For each model and condition, the left graph illustrates the proportion report change as a function of amount of change. Data and models are binned by quantiles, and color indicates the number of high-reliability ellipses. The right graph illustrates the proportion hits for high-reliability items (green), hits for low-reliability items (blue), total hits (purple), and false alarms (gold) as a function of number of high-reliability items. *B.* Model comparison for the Ellipse (left) and Line (right) conditions. Each bar indicates the individual-subject  $\Delta AICc$  between the Use and Ignore Uncertainty models, where a positive value indicates that the Use Uncertainty model is favored. The vertical grey line indicates the median across participants, and the shaded region illustrates the 95% bootstrapped confidence interval of the median. Only  $\Delta AICc$ s are illustrated because the two model comparison metrics gave similar results.

## 293 **6 Model Variants**

294 While the Use Uncertainty model provides a good fit to the data, the two models we have considered thus far contain  
295 assumptions that could be modified. In this section, we factorially compare different formulations of the encoding,  
296 inference, and decision stage of the model (van den Berg, Awh, & Ma, 2014; Acerbi, Wolpert, & Vijayakumar, 2012;  
297 Keshvari et al., 2012). A factorial model comparison is an effective way of testing which assumptions we made were  
298 critical for accounting for human behavior, and thus which are reasonable to make conclusions about. In this section,  
299 we demonstrate that our general conclusions about the use of uncertainty do not depend on the specific assumptions  
300 we made when defining our model. We only discuss the results of the Line condition here, since it is the only condition  
301 that investigates the maintenance of uncertainty in working memory. However, we did the same analysis to the Ellipse  
302 condition data and found consistent results (Appendix 8.3).

### 303 **6.1 Encoding**

304 In both the Use and Ignore Uncertainty models, we assumed that observers' encoding noise followed that of a Variable  
305 Precision model (van den Berg et al., 2012; Fougny et al., 2012). Here, we also consider that observers' memory pre-  
306 cision varies only based on stimulus type, and does not fluctuate on an item-to-item basis. With this "Fixed Precision"  
307 assumption of encoding noise, the  $\kappa$  for each item is determined only by its stimulus type; high-reliability ellipses  
308 would be encoded with parameter  $\kappa_{\text{high}}$ , low-reliability ellipses with  $\kappa_{\text{low}}$ , and lines with  $\kappa_{\text{line}}$ .

### 309 **6.2 Inference**

310 Observers calculate the decision variable according to some inference process, which we allow to be independent of  
311 the true generative process. The potential model mismatch (Orhan & Jacobs, 2014; Beck et al., 2012; Acerbi et al.,  
312 2014) between the true and believed generative process could be due to a result of wrong beliefs about the generative  
313 process or computation limitations that prevent accurate representation of the generative model. We consider that  
314 observers may use partial knowledge of uncertainty, rather than fully Using or Ignoring uncertainty.

315 We consider that the observer may have one of four inference models, listed below in decreasing order of how  
316 many factors the observer takes into account in their uncertainty:

- 317 1. Variable precision (V): the observer believes that mean memory precision varies with the exact stimulus shape  
318 (low-reliability ellipse, high-reliability ellipse, line) and that there is additional noise for each item at each  
319 presentation. This inference model is optimal when the true generative process is Variable precision.
- 320 2. Fixed precision (F): the observer believes that memory precision varies with the exact stimulus shape (low-  
321 reliability ellipse, high-reliability ellipse, line), but does not consider that there is additional noise for each item  
322 at each presentation. This inference model is suboptimal when the true generative process is Variable precision,  
323 but optimal when the true generative process is Fixed precision.



324 3. Limited (L): the observer believes that memory precision varies across shapes (ellipse vs. line). This observer  
325 does not consider differences in precision between high- and low-reliability ellipses or additional noise for each  
326 item at each presentation. This observer is suboptimal.

327 4. Same precision (S): the observer believes that memory precision is the same throughout the condition, and does  
328 not vary with stimulus shape or anything else. This is the “Ignore Uncertainty” observer and is suboptimal.

329 Note that the Variable and Same precision inference schemes here are identical to that of Keshvari and others’ (2012),  
330 and the Fixed precision here is equivalent to their “Equal” precision inference scheme.

### 331 **6.3 Decision Rule**

332 The Use and Ignore Uncertainty models use the optimal decision rule (Eq. 5). Note that participants may have  
333 incorrect assumptions about the noise in their memory, but still be acting in accordance with Bayesian decision theory  
334 (i.e., still using the correct decision rule), resulting in “imperfectly optimal observers” (Maloney & Zhang, 2010).  
335 Alternatively, participants could be calculating the optimal decision variable, but be using a suboptimal decision rule.  
336 Here, we consider observers who use the max rule, responding Change whenever the maximum evidence of change is  
337 greater than some criterion,  $k$ ,

$$\max_i d_i > k, \quad (6)$$

338 rather than averaging  $d_i$ s. These observers are not Bayes-optimal, but are still using probabilistic computation (i.e., still  
339 using their uncertainty) in the calculation of  $d_i$ . In fact, in many cases these decision rules do not result in substantially  
340 different behavior (Ma, Shen, Dziugaite, & van den Berg, 2015). For example, if all  $d_i$ s are similar, then a max and an  
341 average will result in similar values. If the maximum  $d_i$  is substantially larger than the others, both decision rules can  
342 result in similar behavior by adjusting  $k$ .

### 343 **6.4 Parameters**

344 There are two possible encoding schemes ((V)ariable, (F)ixed), four possible inference schemes ((V)ariable, (F)ixed,  
345 (L)imited, (S)ame), and two possible decision rules ((O)ptimal, (M)ax). Factorially combining each of these char-  
346 acteristics would yield 16 different models. We choose not to consider the models in which the generative model is  
347 “F” but the observer assumes “V” under the assumption that people tend not to assume the (perceptual) world is more  
348 complicated than it actually is; thus, we test a total of 14 models. We denote each model by the letters corresponding to  
349 their encoding scheme, inference scheme, and decision rule (e.g., VVO is the model with Variable precision encoding,  
350 an observer assumes Variable precision, and an Optimal decision rule). The VVO model is the Use Uncertainty model;  
351 the VSO model is the Ignore Uncertainty model.

352 *Encoding parameters.* Like before, observers with Variable precision encoding have parameters  $\bar{J}_{\text{high}}$ ,  $\bar{J}_{\text{low}}$ ,  $\bar{J}_{\text{line}}$ ,  
353 and  $\tau$ . Observers with Fixed precision encoding have parameters  $J_{\text{high}}$ ,  $J_{\text{low}}$ , and  $J_{\text{line}}$ .

354 *Inference parameters.* For the observer who correctly infers their encoding process (i.e., VVO, VVM, FFO, or  
 355 FFM), there are no additional parameters. If the observer has Variable precision encoding but does not take into account  
 356 individual-item variations (i.e., VFO or VFM), then the assumed precision is  $J_{\text{high}} = \bar{J}_{\text{high}}$ ,  $J_{\text{low}} = \bar{J}_{\text{low}}$ , and  $J_{\text{line}} = \bar{J}_{\text{line}}$   
 357 for high-reliability ellipses, low-reliability ellipses, and lines, respectively. Limited inference observers (i.e., VLO,  
 358 VLM, FLO, FLM) have two additional parameters:  $J_{\text{ass},e}$  and  $J_{\text{ass},l}$ , corresponding to the assumed precision of the  
 359 ellipses and lines, respectively. Same inference observers, who do not take any memory variations into account (i.e.,  
 360 VSO, VSM, FSO, FSM), have one additional parameter  $J_{\text{ass}}$ , corresponding to the assumed precision of all items.

361 *Decision parameters.* Observers using both the optimal or max decision rule have parameter  $k$ , corresponding to  
 362 the decision criterion. If any item has a decision variable greater than  $k$ , then they will respond Change.

363 Each model and their corresponding parameters is listed in Table 2. Note that the Same inference observer who  
 364 uses the max rule (i.e., VSM, FSM) has one less parameter than their Optimal decision rule counterpart (i.e., VSO,  
 365 FSO) because making a decision depends only on the item with the largest measured change.

| Encoding   | Inference  | Decision Rule                                                                                                                                    |                                                                                                                                                  |
|------------|------------|--------------------------------------------------------------------------------------------------------------------------------------------------|--------------------------------------------------------------------------------------------------------------------------------------------------|
|            |            | (O)ptimal                                                                                                                                        | (M)ax                                                                                                                                            |
| (V)ariable | (V)ariable | $\bar{J}_{\text{high}}, \bar{J}_{\text{low}}, \tau, k, \lambda, \sigma_d(\bar{J}_{\text{line}})$                                                 | $\bar{J}_{\text{high}}, \bar{J}_{\text{low}}, \tau, k, \lambda, \sigma_d(\bar{J}_{\text{line}})$                                                 |
|            | (F)ixed    | $\bar{J}_{\text{high}}, \bar{J}_{\text{low}}, \tau, k, \lambda, \sigma_d(\bar{J}_{\text{line}})$                                                 | $\bar{J}_{\text{high}}, \bar{J}_{\text{low}}, \tau, k, \lambda, \sigma_d(\bar{J}_{\text{line}})$                                                 |
|            | (L)imited  | $\bar{J}_{\text{high}}, \bar{J}_{\text{low}}, \bar{J}_{\text{ass},e}, \tau, k, \lambda, \sigma_d(\bar{J}_{\text{line}}, \bar{J}_{\text{ass},l})$ | $\bar{J}_{\text{high}}, \bar{J}_{\text{low}}, \bar{J}_{\text{ass},e}, \tau, k, \lambda, \sigma_d(\bar{J}_{\text{line}}, \bar{J}_{\text{ass},l})$ |
|            | (S)ame     | $\bar{J}_{\text{high}}, \bar{J}_{\text{low}}, \bar{J}_{\text{ass}}, \tau, k, \lambda, \sigma_d(\bar{J}_{\text{line}})$                           | $\bar{J}_{\text{high}}, \bar{J}_{\text{low}}, \tau, k, \lambda, \sigma_d(\bar{J}_{\text{line}})$                                                 |
| (F)ixed    | (F)ixed    | $J_{\text{high}}, J_{\text{low}}, k, \lambda, \sigma_d(J_{\text{line}})$                                                                         | $J_{\text{high}}, J_{\text{low}}, k, \lambda, \sigma_d(J_{\text{line}})$                                                                         |
|            | (L)imited  | $J_{\text{high}}, J_{\text{low}}, J_{\text{ass},e}, k, \lambda, \sigma_d(J_{\text{line}}, J_{\text{ass},l})$                                     | $J_{\text{high}}, J_{\text{low}}, J_{\text{ass},e}, k, \lambda, \sigma_d(J_{\text{line}}, J_{\text{ass},l})$                                     |
|            | (S)ame     | $J_{\text{high}}, J_{\text{low}}, J_{\text{ass}}, k, \lambda, \sigma_d(J_{\text{line}})$                                                         | $J_{\text{high}}, J_{\text{low}}, k, \lambda, \sigma_d(J_{\text{line}})$                                                                         |

Table 2: **Model parameters.** Model parameters for Line condition. Parameters unnecessary for fitting the Ellipse condition are displayed in parentheses. The top colored cell corresponds to parameters of the Use Uncertainty (VVO) model. The bottom colored cell corresponds to the parameters of the Ignore Uncertainty (VSO) model.

## 366 6.5 Model Comparison Results

367 As previously described, we estimated parameters for each participant and compared models using AICc and BIC. In  
 368 this section, we only discuss the results of the Line condition using median AICc and BIC differences between the  
 369 VVO (Use Uncertainty) and other models. However, we report the results of the Ellipse condition in the Appendix  
 370 8.3.

371 The factorial model comparison results corroborate our earlier result. Models in which observers correctly used  
 372 their memory uncertainty (i.e., VVO, VVM, FFO, FFM) were indistinguishable from one another according to  $\Delta\text{AICc}$   
 373 and  $\Delta\text{BIC}$  (Table 3, bar graphs in Figure 5). These four models, however, fit substantially better than the remaining  
 374 10 models in which the observer does not fully know or use their memory uncertainty in their decisions, indicated

375 by the 95% CI of the median  $\Delta\text{AICc}$  and  $\Delta\text{BIC}$  being greater than 0. These results imply that the specific encoding,  
 376 inference, and decision rule do not matter as much the match between the encoding and inference scheme. In other  
 377 words, the models that are able to capture the data are those in which observers' uncertainty reflects that of the true  
 378 encoding process.

379 In the Appendix, we additionally report the sum of the  $\Delta\text{AICc}$  and  $\Delta\text{BIC}$  and group Bayesian Model Selection  
 380 (BMS) for both conditions (Appendix 8.4 and 8.5, respectively). Summing the  $\Delta\text{AICc}$  and  $\Delta\text{BIC}$  explicitly assumes  
 381 that participants are all fit by the same model, while group BMS allows for participant heterogeneity and directly infers  
 382 the distribution of participants across models. Using these alternative model comparison metrics do not change the  
 383 results; behavior was overwhelmingly best explained by a model that assumes that uncertainty is maintained accurately  
 384 and used.

| Encoding   | Inference  | Decision Rule       |                    |                     |                    |
|------------|------------|---------------------|--------------------|---------------------|--------------------|
|            |            | (O)ptimal           |                    | (M)ax               |                    |
|            |            | $\Delta\text{AICc}$ | $\Delta\text{BIC}$ | $\Delta\text{AICc}$ | $\Delta\text{BIC}$ |
| (V)ariable | (V)ariable | 0 [0, 0]            | 0 [0, 0]           | 4 [-1, 13]          | 4 [-1, 13]         |
|            | (F)ixed    | 11 [4, 26]          | 11 [4, 26]         | 22 [11, 50]         | 22 [11, 50]        |
|            | (L)imited  | 97 [43, 256]        | 123 [69, 283]      | 255 [30, 366]       | 282 [56, 392]      |
|            | (S)ame     | 108 [58, 370]       | 122 [71, 383]      | 170 [138, 235]      | 170 [138, 235]     |
| (F)ixed    | (F)ixed    | 3 [3, 19]           | -10 [-16, 9]       | 19 [9, 38]          | 6 [-4, 25]         |
|            | (L)imited  | 53 [23, 82]         | 66 [37, 96]        | 51 [24, 100]        | 64 [37, 113]       |
|            | (S)ame     | 39 [17, 91]         | 39 [17, 91]        | 148 [84, 167]       | 135 [70, 154]      |

Table 3: **Median  $\Delta\text{AICc}$  and  $\Delta\text{BIC}$ : Line condition.** The median and 95% bootstrapped confidence interval of the  $\Delta\text{AICc}$  and  $\Delta\text{BIC}$ . A positive value indicates that the VVO model provides a better fit to the data. The cells corresponding to the Use (VVO) and Ignore (VSO) Uncertainty models are colored in blue.

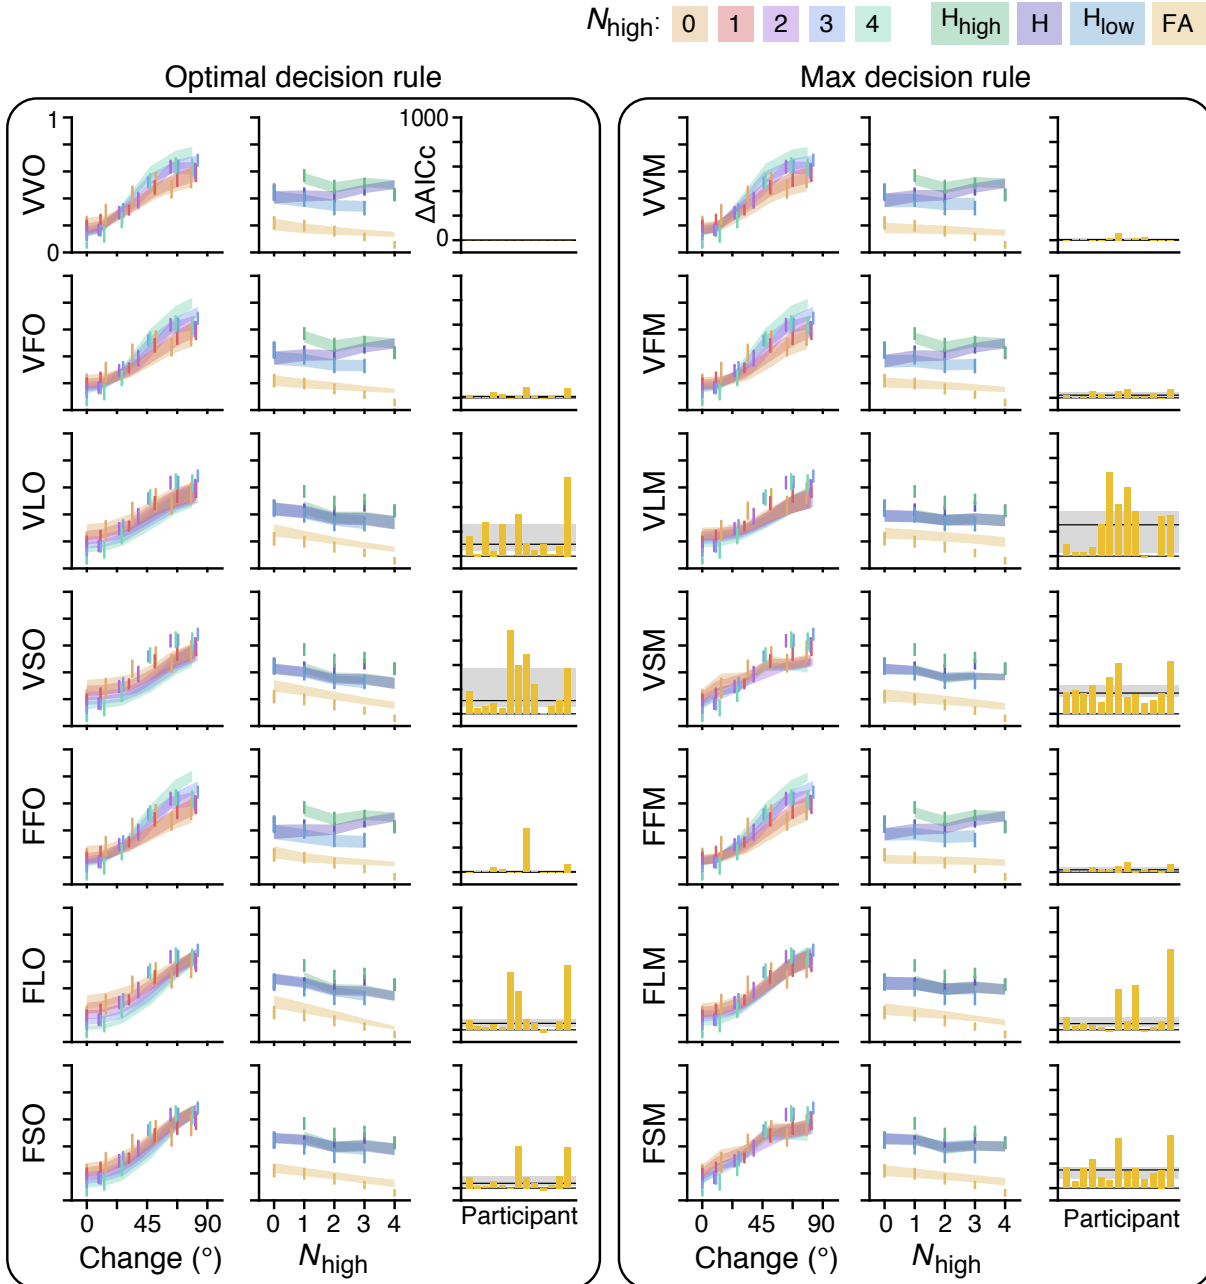

Figure 5: **Factorial model comparison.** Model predictions and performance of all possible combinations of different encoding, inference, and decision rules.  $M \pm SEM$  data (error bars) and model fits (fills) for all models, organized into two columns by decision rule. For each model (each row within each column), the left graph illustrates the proportion report change as a function of amount of change. Color indicates the number of high-reliability ellipses (legend at the top of the figure). The middle graph illustrates the proportion hits for high-reliability items (green), hits for low-reliability items (blue), hits averaged across the display (purple), and false alarms (gold) as a function of number of high-reliability items (legend at the top right of the figure). The right graph illustrates the individual-participant  $\Delta AICc$ , where positive numbers indicate the VVO model is a better fit to the data. The grey horizontal line and shaded region illustrates median and the 95% bootstrapped confidence interval of the median across participants.

## 385 7 Discussion

386 In this paper, we investigated whether uncertainty is maintained and implicitly used in a working memory-based  
387 decision. First, we demonstrated that people use uncertainty implicitly in a working memory task if that uncertainty  
388 information was available after the delay (i.e., if uncertainty did not need to be maintained). Second, and more  
389 importantly, we showed that people not only use uncertainty, but maintain this information over the working memory  
390 delay. Finally, we factorially tested different model encoding schemes, inference schemes, and decision rules and  
391 found that people were best described by models in which observers accurately maintain and use uncertainty in their  
392 decision.

393 First, we demonstrated that people could use uncertainty implicitly in a working memory task if that uncertainty  
394 information was experimentally available. While the change detection task has been an experimental staple in the  
395 working memory literature (e.g., Luck & Vogel, 1997; Phillips, 1974; Pashler, 1988), the majority of these tasks  
396 feature large, categorical changes in the stimulus. In contrast, our task, which is a direct experimental replication of  
397 that of Keshvari and others (2012), featured changes that varied on a trial-to-trial basis. Trial-to-trial fluctuations in  
398 stimuli and withholding of feedback allow for a strongest test of probabilistic computation because observers would  
399 need to maintain a belief distribution over stimulus values to maximize performance in this task (Ma & Jazayeri,  
400 2014). Through formal model comparison, we showed that all participants in the Ellipse condition are better fit by the  
401 Use Uncertainty model than the Ignore Uncertainty model. The Use Uncertainty model was identical to the model that  
402 was found to describe participant data best in the study by Keshvari et al. (2012). These results are also qualitatively  
403 consistent with Devkar and others' (2017) work, despite being slightly different tasks.

404 Second, and more importantly, we showed that people not only use uncertainty, but maintain this information  
405 over the working memory delay. Like in the Ellipse condition, we found that all participants in the Line condition  
406 were better fit by the Use Uncertainty model than the Ignore Uncertainty model. However, the conclusion of this  
407 model comparison is critically different. In the Ellipse condition as well as in previous studies (Keshvari et al., 2012;  
408 Devkar et al., 2017), the ellipses were presented after the working memory delay, with the same reliability as before.  
409 With these experimental designs, reliability information could be used as a heuristic to inform uncertainty, thus not  
410 requiring this information to be maintained in memory. In other words, these previous studies cannot make any  
411 conclusions about the contents of working memory, only the decision-making process that follows it. Our result, in  
412 contrast, demonstrates that uncertainty was actually *maintained* in working memory, since the information was not  
413 available to the participants through a heuristic such as ellipse reliability.

414 These results provide evidence that people can maintain and use uncertainty in an *implicit* decision-making  
415 paradigm. This is in agreement with studies that asked participants to make an explicit reports such as confidence  
416 ratings (Rademaker et al., 2012; Vandenbroucke et al., 2014; Samaha & Postle, 2017). This is also in agreement with  
417 the “choose best” (Fougnie et al., 2012; Suchow et al., 2017) and wager paradigms (Yoo et al., 2018; Honig et al.,  
418 2020). These paradigms are explicit in the sense that participants deliberate on a decision that is directly related to their  
419 conscious uncertainty in a memory, but implicit in the sense that this uncertainty must be taken into account in another  
420 perceptual decision.

421 Finally, we conducted a factorial model comparison to investigate whether our conclusions were due to specific  
422 assumptions about model encoding schemes, inference schemes, and decision rules. We found that the most important  
423 aspect of a model was that its encoding and inference schemes were matched, providing strong evidence that people  
424 accurately maintain and use their uncertainty in working memory-based decisions. Our results are somewhat incon-  
425 sistent with research showing strong support for Variable precision encoding over Fixed precision encoding (van den  
426 Berg et al., 2014; Keshvari et al., 2012), and consistent with research showing that optimal and max decision rules are  
427 difficult to distinguish through model comparison (Ma et al., 2015). Future experiments may attempt to tease apart  
428 these two decision rules by manipulating the prior probability of change trials or the behavioral relevance of individual  
429 items.

430 Our results suggest that existing computational models of working memory that currently ignore uncertainty should  
431 be updated. For example, attractor network models currently maintain a point estimate of a single item feature through  
432 the mean of a stereotyped bump in a network of neurons (Ermentrout, 1998; Wang, 2001; Compte, 2006). Thus,  
433 there is typically no notion of uncertainty in this framework. Lim and Goldman (2014) demonstrated that altering the  
434 network connectivity and dynamics results in “negative-derivative feedback models,” in which networks can vary not  
435 only in mean but also in amplitude. Probabilistic population coding (PPC) and neural network models have imple-  
436 mented precision through input gain (Ma, Beck, Latham, & Pouget, 2006; Orhan & Ma, 2017). Additional research  
437 must investigate whether these negative-derivative feedback models can represent a memory’s precision through the  
438 amplitude of the network maintaining it, precision which could be read out from the observer as uncertainty.

439 Additionally, computational models could be used to decode uncertainty from neural activity in working memory  
440 tasks. Work in visual perception demonstrates that uncertainty information is represented in primary visual cortex  
441 (van Bergen, Ma, Pratte, & Jehee, 2015; van Bergen, 2019; Walker, Cotton, Ma, & Tolias, 2020; Hénaff, Boundy-  
442 Singer, Meding, Ziemba, & Goris, 2020). These studies built normative Bayesian models to infer stimulus value from  
443 BOLD signal. The likelihood of the stimulus, and thus uncertainty, could be read out from the models. Estimates  
444 of trial-specific uncertainty are positively correlated with error, suggesting that primary visual cortex held uncertainty  
445 information. Since working memories have been shown to be maintained in the same sensory areas with which they  
446 are perceived (e.g. Curtis & D’Esposito, 2003; Postle, 2006; D’Esposito & Postle, 2015; Harrison & Tong, 2009),  
447 perhaps visual working memory uncertainty is also stored in visual cortex. To more rigorously test the representation  
448 of uncertainty decoded from BOLD data, future studies can correlate decoded uncertainty with behavioral measures of  
449 uncertainty such as confidence ratings (Rademaker et al., 2012) or post-decision wagers (Yoo et al., 2018; Honig et al.,  
450 2020). Additionally, future studies can try to fit individual-trial data using these methods, which is more compelling  
451 evidence in favor of a model than a correlation.

452 Overall, this paper shows that people have uncertainty that reflects their memory noise at an item-specific level  
453 and they maintain this information over a working memory delay. This research demonstrates that there is other  
454 information, beyond a point estimate, maintained in working memory and used in later decisions.

<sup>455</sup> **Acknowledgements:** We thank Marissa Evans for collecting the bulk of the data in this study and Emin Orhan for  
<sup>456</sup> collaborating on a previous iteration of this project. W.J.M is supported by award number R01EY020958. A.H.Y. was  
<sup>457</sup> supported by training grant T32 EY7136-25. This work was supported in part through the NYU IT High Performance  
<sup>458</sup> Computing resources, services, and staff expertise.

## References

- 459
- 460 Acerbi, L., & Ma, W. J. (2017). Practical Bayesian optimization for model fitting with Bayesian Adaptive Direct  
461 Search. *Advances in Neural Information Processing Systems*, *30*, 1834–1844.
- 462 Acerbi, L., Ma, W. J., & Vijayakumar, S. (2014). A framework for testing identifiability of Bayesian models of  
463 perception. *Advances in Neural Information Processing Systems*, 1026–1034.
- 464 Acerbi, L., Wolpert, D. M., & Vijayakumar, S. (2012). Internal representations of temporal statistics and feedback  
465 calibrate motor-sensory interval timing. *PLOS Computational Biology*, *8*(11).
- 466 Adam, K. C. S., & Vogel, E. K. (2017). Confident failures: Lapses of working memory reveal a metacognitive blind  
467 spot. *Attention, Perception & Psychophysics*, *79*(5), 1506–1523. doi: 10.3758/s13414-017-1331-8
- 468 Alais, D., & Burr, D. (2004). The ventriloquist effect results from near-optimal bimodal integration. *Current Biology*,  
469 *14*(3), 257–262. doi: 10.1016/j.cub.2004.01.029
- 470 Baddeley, A. (2003). Working memory: Looking back and looking forward. *Nature Reviews Neuroscience*, *4*,  
471 829–839. doi: 10.1038/nrn1201
- 472 Baddeley, A., & Hitch, G. (1974). Working memory. *The Psychology of Learning and Motivation*, *8*, 47–89.
- 473 Barthelme, S., & Mamassian, P. (2010). Flexible mechanisms underlie the evaluation of visual confidence. *Pro-*  
474 *ceedings of the National Academy of Sciences of the United States of America*, *107*(48), 20834–20839. doi:  
475 10.1073/pnas.1007704107
- 476 Bays, M. P., & Husain, M. (2008). Dynamic shifts of limited working memory resources in human vision. *Science*,  
477 *321*, 851–854.
- 478 Beck, J. M., Ma, W. J., Pitkow, X., Latham, P. E., & Pouget, A. (2012). Not noisy, just wrong: The role of suboptimal  
479 inference in behavioral variability. *Neuron*, *74*(1), 30–39. doi: 10.1016/j.neuron.2012.03.016
- 480 Bona, S., Cattaneo, Z., Vecchi, T., Soto, D., & Silvanto, J. (2013). Metacognition of visual short-term memory:  
481 Dissociation between objective and subjective components of vstm. *Frontiers in Psychology*, *4*(62).
- 482 Bona, S., & Silvanto, J. (2014). Accuracy and confidence of visual short-term memory do not go hand-in-hand:  
483 Behavioral and neural dissociations. *PLOS One*, *9*(3). doi: 10.1371/journal.pone.0090808
- 484 Compte, A. (2006). Computational and in vitro studies of persistent activity: Edging towards cellular and synaptic  
485 mechanisms of working memory. *Neuroscience*, *139*(1), 135–151.
- 486 Conway, A. R. A., Kane, M. J., & Engle, R. W. (2003). Working memory capacity and its relation to general  
487 intelligence. *Trends in Cognitive Sciences*, *7*(12), 547–552. doi: 10.1016/j.tics.2003.10.005
- 488 Curtis, C. E., & D’Esposito, M. (2003). Persistent activity in the prefrontal cortex during working memory. *Trends in*  
489 *Cognitive Sciences*, *7*(9), 415–423. doi: 10.1016/S1364-6613(03)00197-9
- 490 D’Esposito, M., & Postle, R. B. (2015). The cognitive neuroscience of working memory. *Annual Review of Psychol-*  
491 *ogy*, *66*, 115–142. doi: 10.1146/annurev-psych-010814-015031
- 492 Devkar, D., Wright, A. A., & Ma, W. J. (2017). Monkeys and humans take local uncertainty into account when  
493 localizing a change. *Journal of Vision*, *17*(11). doi: 10.1167/17.11.4
- 494 Edwards, W. (1954). The theory of decision making. *Psychological Bulletin*, *51*(4), 380–417.



- 495 Ermentrout, B. (1998). Neural networks as spatio-temporal pattern-forming systems. *Reports on Progress in Physics*,  
496 61(4), 353–430. doi: 10.1088/0034-4885/61/4/002
- 497 Ernst, M. O., & Banks, M. S. (2002). Humans integrate visual and haptic information in a statistically optimal fashion.  
498 *Nature*, 415(6870), 429–433. doi: 10.1038/415429a
- 499 Fougnie, D., Suchow, J. W., & Alvarez, G. A. (2012). Variability in the quality of visual working memory. *Nature*  
500 *Communications*, 3.
- 501 Fukuda, K., Vogel, E., Mayr, U., & Awh, E. (2010). Quantity, not quality: The relationship between fluid intelligence  
502 and working memory capacity. *Psychonomic Bulletin & Review*, 17(5), 673–679. doi: 10.3758/17.5.673
- 503 Harrison, S. A., & Tong, F. (2009). Decoding reveals the contents of visual working memory in early visual areas.  
504 *Nature*, 458(7238), 632–635. doi: 10.1038/nature07832
- 505 Hénaff, O. J., Boundy-Singer, Z. M., Meding, K., Ziemba, C. M., & Goris, R. L. T. (2020). Representation of visual  
506 uncertainty through neural gain variability. *Nature Communications*, 11.
- 507 Honig, M., Ma, W. J., & Fougnie, D. (2020). Humans incorporate trial-to-trial working memory uncertainty into  
508 rewarded decisions. *Proceedings of the National Academy of Sciences*, 117(15), 8391–8397. doi: 10.1073/  
509 pnas.1918143117
- 510 Hurvich, C. M., & Tsai, C. L. (1987). Regression and time series model selection in small samples. *Biometrika*, 76,  
511 297–307.
- 512 Jazayeri, M., & Shadlen, N. M. (2010). Temporal context calibrates interval timing. *Nature Neuroscience*, 13(8),  
513 1020–1026.
- 514 Just, M. A., & Carpenter, P. A. (1992). A capacity theory of comprehension: Individual differences in working  
515 memory. *Psychological Review*, 99(1), 122–149. doi: 10.1037/0033-295X.99.1.122
- 516 Keshvari, S., van den Berg, R., & Ma, W. J. (2012). Probabilistic computation in human perception under variability  
517 in encoding precision. *PLOS One*, 7.
- 518 Knill, D. C., & Pouget, A. (2004). The Bayesian brain: The role of uncertainty in neural coding and computation.  
519 *Trends in Neurosciences*, 27(12), 712–719. doi: 10.1016/j.tins.2004.10.007
- 520 Körding, P. K., & Wolpert, M. D. (2004). Bayesian integration in sensorimotor learning. *Nature*, 427, 244–7.
- 521 Levenstein, D., Alvarez, V. A., Amarasingham, A., Azab, H., Gerkin, R. C., Hasenstaub, A., . . . Redish, D. A. (2020).  
522 On the role of theory and modeling in neuroscience. *arXiv*.
- 523 Lim, S., & Goldman, M. S. (2014). Balanced cortical microcircuitry for spatial working memory based on corrective  
524 feedback control. *Journal of Neuroscience*, 34(20), 6790–6806. doi: 10.1523/JNEUROSCI.4602-13.2014
- 525 Luck, S. J., & Vogel, E. K. (1997). The capacity of visual working memory for features and conjunctions. *Nature*,  
526 390, 279–281.
- 527 Ma, W. J. (2010). Signal detection theory, uncertainty, and Poisson-like population codes. *Vision Research*, 50(22),  
528 2308–2319. doi: 10.1016/j.visres.2010.08.035
- 529 Ma, W. J., Beck, J. M., Latham, P. E., & Pouget, A. (2006). Bayesian inference with probabilistic population codes.  
530 *Nature Neuroscience*, 9, 1432–1438. doi: 10.1038/nn1790

- 531 Ma, W. J., & Jazayeri, M. (2014). Neural coding of uncertainty and probability. *Annual review of neuroscience*, 37,  
532 205–220. doi: 10.1146/annurev-neuro-071013-014017
- 533 Ma, W. J., Navalpakkam, V., Beck, M. J., van den Berg, R., & Pouget, A. (2011). Behavior and neural basis of  
534 near-optimal visual search. *Nature Neuroscience*, 14(6), 783–90.
- 535 Ma, W. J., Shen, S., Dziugaite, G., & van den Berg, R. (2015). Requiem for the max rule? *Vision Research*, 116,  
536 179–193.
- 537 Maloney, L. T., & Mamassian, P. (2009). Bayesian decision theory as a model of human visual perception: Testing  
538 Bayesian transfer. *Visual Neuroscience*, 26(1), 147–155. doi: 10.1017/S0952523808080905
- 539 Maloney, L. T., & Zhang, H. (2010). Decision-theoretic models of visual perception and action. *Vision Research*,  
540 50(23), 2362–2374. doi: 10.1016/j.visres.2010.09.031
- 541 Maniscalco, B., & Lau, H. (2015, Jul 3). Manipulation of working memory contents selectively impairs metacognitive  
542 sensitivity in a concurrent visual discrimination task. *Neuroscience of consciousness*, 2015(1). doi: 10.1093/nc/  
543 niv002
- 544 Mueller, S. T., & Weidemann, C. T. (2008). Decision noise: An explanation for observed violations of signal detection  
545 theory. *Psychonomic Bulletin & Review*, 15(3), 465–494. doi: 10.3758/PBR.15.3.465
- 546 Orhan, A. E., & Jacobs, R. A. (2014). Are performance limitations in visual short-term memory tasks due to capacity  
547 limitations or model mismatch? *arXiv*.
- 548 Orhan, A. E., & Ma, W. J. (2017). Efficient probabilistic inference in generic neural networks trained with non-  
549 probabalistic feedback. *Nature Communications*, 8(138).
- 550 Pashler, H. (1988). Familiarity and visual change detection. *Perception & Psychophysics*, 44(4), 369–378.
- 551 Phillips, A. W. (1974). On the distinction between sensory storage and short-term visual memory. *Perception &*  
552 *Psychophysics*, 16(2). doi: 10.3758/BF03203943
- 553 Postle, B. R. (2006). Working memory as an emergent property of the mind and brain. *Neuroscience*, 139(1), 23–38.  
554 doi: 10.1016/j.neuroscience.2005.06.005
- 555 Rademaker, R. L., Tredway, C. H., & Tong, F. (2012). Introspective judgments predict the precision and likelihood of  
556 successful maintenance of visual working memory. *Journal of Vision*, 12, 21–21.
- 557 Sahar, T., Sidi, Y., & Makovski, T. (2020). A metacognitive perspective of visual working memory with rich complex  
558 objects. *Frontiers in Psychology*, 11.
- 559 Samaha, J., Barrett, J. J., Sheldon, D. A., LaRocque, J. J., & Postle, R. B. (2016). Dissociating perceptual confidence  
560 from discrimination accuracy reveals no influence of metacognitive awareness on working memory. *Frontiers*  
561 *in Psychology*, 7.
- 562 Samaha, J., & Postle, B. R. (2017). Correlated individual differences suggest a common mechanism underlying  
563 metacognition in visual perception and visual short-term memory. *Proceedings of The Royal Society B Biologi-*  
564 *cal Sciences*, 284(1867). doi: 10.1098/rspb.2017.2035
- 565 Schwarz, G. (1978). Estimating the dimension of a model. *The Annals of Statistics*, 6, 461–464.
- 566 Stephan, K. E., Penny, W. D., Daunizeau, J., Moran, R. J., & Friston, K. J. (2009). Bayesian model selection for group

- 567 studies. *NeuroImage*, 46, 1004–1017. doi: 10.1016/j.neuroimage.2009.03.025
- 568 Stocker, A. A., & Simoncelli, P. E. (2006). Noise characteristics and prior expectations in human visual speed  
569 perception. *Nature Neuroscience*, 9(4), 578–85.
- 570 Suchow, J. W., Fougny, D., & Alvarez, G. A. (2017). Looking inward and back: Real-time monitoring of visual  
571 working memories. *Journal of Experimental Psychology. Learning, Memory, and Cognition*, 43(4), 660–668.  
572 doi: 10.1037/xlm0000320
- 573 van Beers, J. R., Sittig, C. A., & Gon, J. J. (1999). Integration of proprioceptive and visual position-information: An  
574 experimentally supported model. *Journal of neurophysiology*, 81(3), 1355–64.
- 575 van Bergen, R. S. (2019). Probabilistic representation in human visual cortex reflects uncertainty in serial decisions.  
576 *Journal of Neuroscience*, 39(41), 8164–8176. doi: 10.1523/JNEUROSCI.3212-18.2019
- 577 van Bergen, R. S., Ma, W. J., Pratte, M. S., & Jehee, J. F. (2015). Sensory uncertainty decoded from visual cortex  
578 predicts behavior. *Nature Neuroscience*(18), 1728–1730.
- 579 van den Berg, R., Awh, E., & Ma, W. J. (2014). Factorial comparison of working memory models. *Psychological*  
580 *Review*, 121, 124–149. doi: 10.1037/a0035234
- 581 van den Berg, R., Shin, H., Chou, W. C., George, R., & Ma, W. J. (2012). Variability in encoding precision accounts  
582 for visual short-term memory limitations. *Proceedings of the National Academy of Sciences*, 109, 8780–8785.
- 583 van den Berg, R., Yoo, A. H., & Ma, W. J. (2017). Fechner’s law in metacognition: A quantitative model of visual  
584 working memory confidence. *Psychological Review*, 124(2), 197–214. doi: 10.1037/rev0000060
- 585 Vandenbroucke, E. A. R., Sligte, I. G., Barrett, A. B., Seth, A. K., Fahrenfort, J. J., & Lamme, V. A. (2014). Accurate  
586 metacognition for visual sensory memory representations. *Psychological science*, 25(4).
- 587 van Opheusden, B., Acerbi, L., & Ma, W. J. (2020). Unbiased and efficient log-likelihood estimation with Inverse  
588 Binomial Sampling. *arXiv*.
- 589 Vlassova, A., Donkin, C., & Pearson, J. (2014, Nov 11). Unconscious information changes decision accuracy but  
590 not confidence. *Proceedings of the National Academy of Sciences of the United States of America*, 111(45),  
591 16214–16218. doi: 10.1073/pnas.1403619111
- 592 Walker, E., Cotton, J., Ma, W. J., & Tolia, A. (2020). A neural basis of probabilistic computation in visual cortex.  
593 *Nature Neuroscience*, 23, 122–129. doi: 10.1038/s41593-019-0554-5
- 594 Wang, X. J. (2001). Synaptic reverberation underlying mnemonic persistent activity. *Trends in Neurosciences*, 24(8),  
595 455–463.
- 596 Yoo, A. H., Klyszejko, Z., Curtis, E. C., & Ma, W. J. (2018). Strategic allocation of working memory resource.  
597 *Scientific Reports*, 8(1). doi: 10.1038/s41598-018-34282-1
- 598 Zhang, W., & Luck, J. S. (2008). Discrete fixed-resolution representations in visual working memory. *Nature*, 453,  
599 233–235.
